# Supplementary material for: Phosphorylation of the CDK Substrate MSCDK Regulates Synaptonemal Complex Disassembly and Meiosis Metaphase I Transition
Source: Preprints.org preprint supplement (doi:10.20944/preprints202304.1044.v1), 2023-04-27
Supplement: Supplementary file 1 [file supplementary]

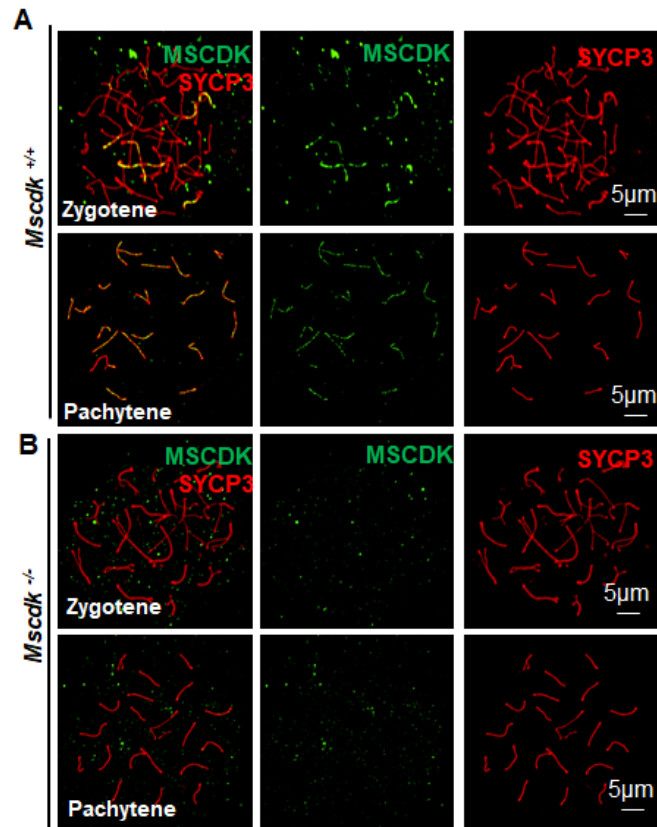

**Supplemental figure1. Verification of the MSCDK antibody efficiency. (A)** Spermatocyte nuclei from a *Mscdk*<sup>+/+</sup> mouse immunolabeled for MSCDK and SYCP3. **(B)** Spermatocyte nuclei from a *Mscdk*<sup>-/-</sup> mutant mouse immunolabeled for MSCDK and SYCP3.

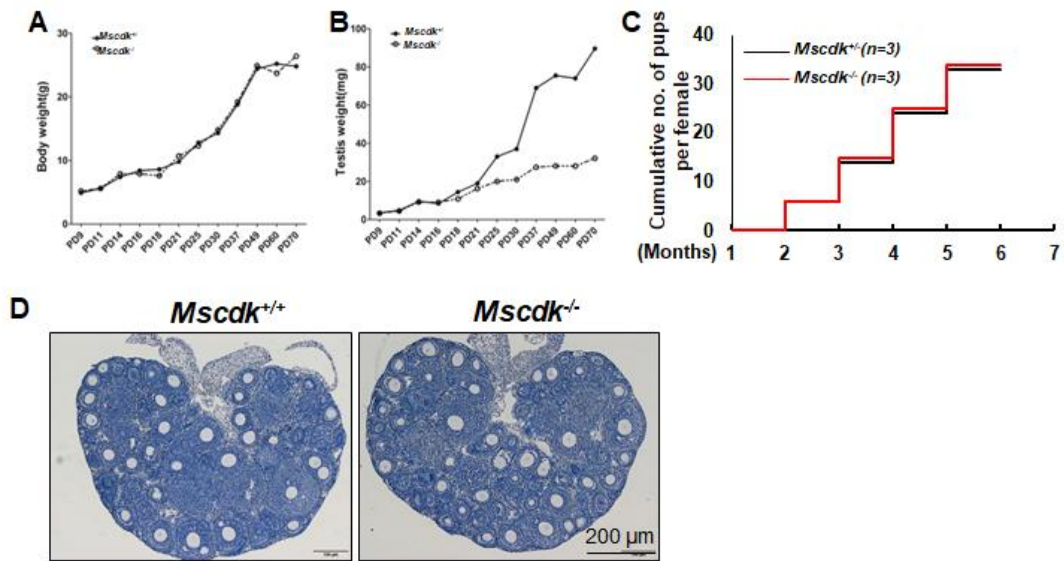

**Supplemental figure2. (A)** Body weight of *Mscdk*<sup>+/+</sup> and *Mscdk*<sup>-/-</sup> mice **(B)** Weights of testes derived from *Mscdk*<sup>+/+</sup> and *Mscdk*<sup>-/-</sup> males at indicated ages. **(C)** Cumulative numbers of pups per female during the defined time period. n = 3 mice for each genotype. **(D)** Hematoxylin staining of ovary sections from PD19 *Mscdk*<sup>+/+</sup> and *Mscdk*<sup>-/-</sup> mice.

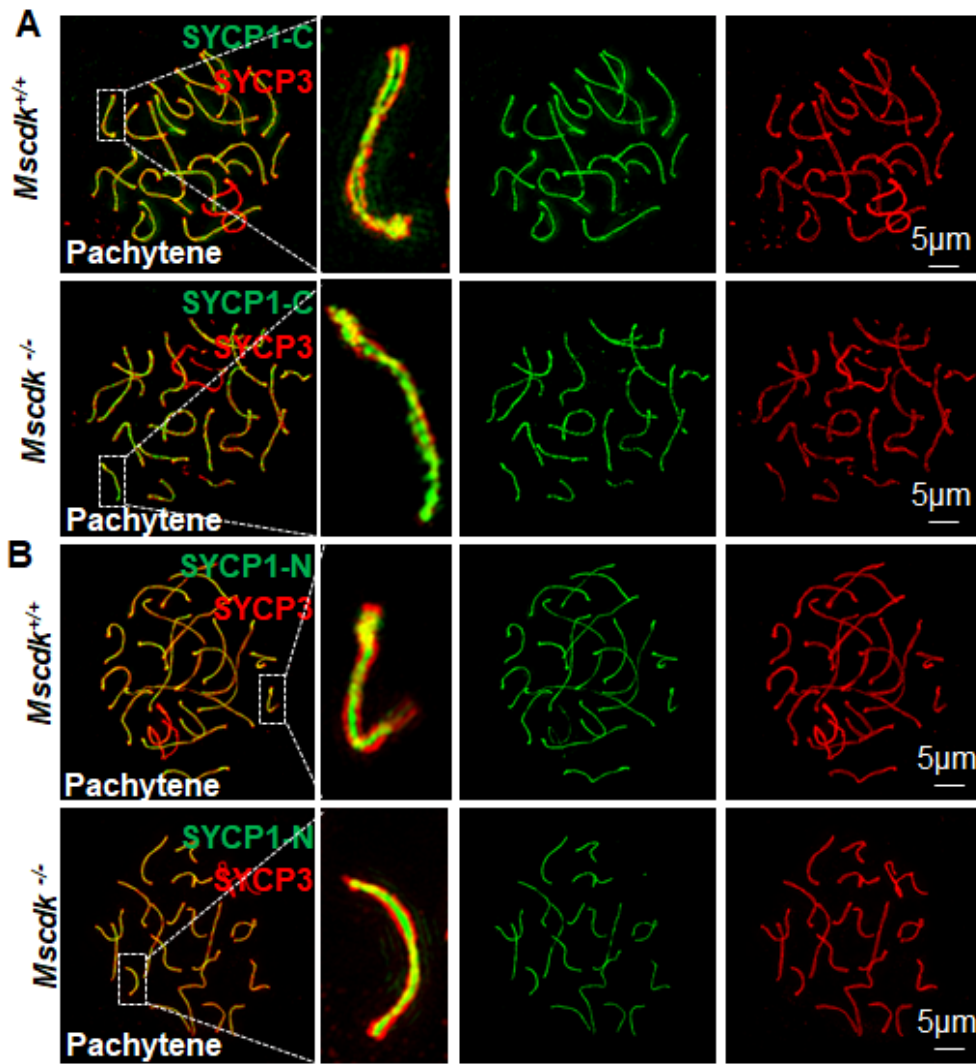

**Supplemental figure3. (A)** SIM images of spermatocyte chromosome spreads immunostained for SYCP3 (red) and SYCP1 C-terminal (green) from PD35 testes. **(B)** SIM images of spermatocyte chromosome spreads immunostained for SYCP3 (red) and SYCP1 N-terminal (green) from PD35 testes.

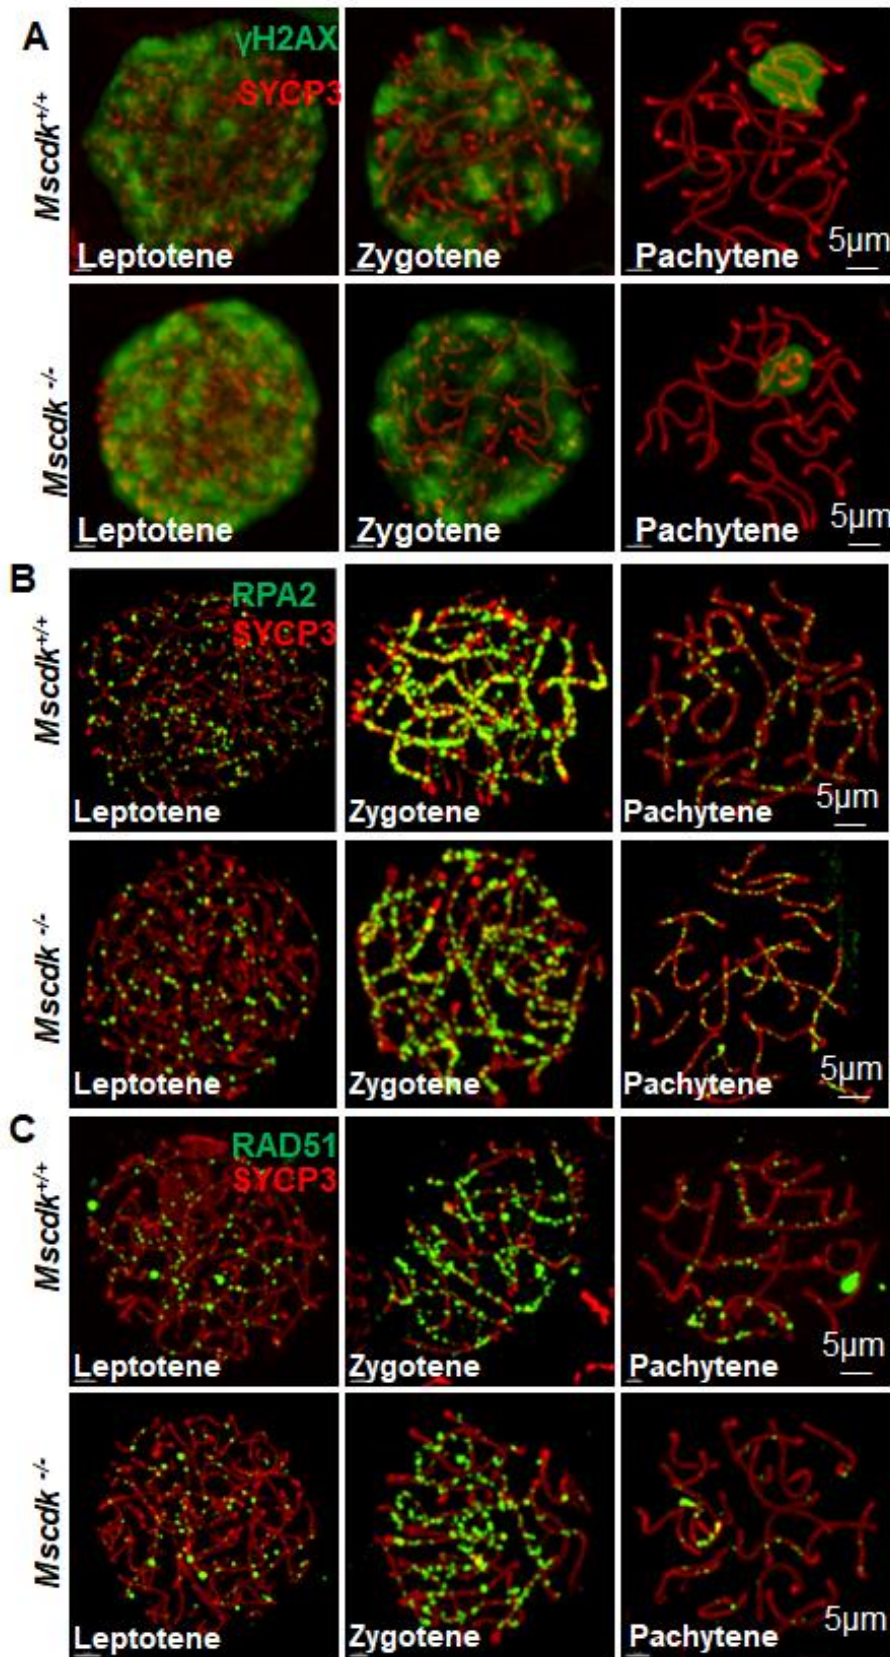

**Supplemental figure4.** Representative images of spermatocytes from the leptotene to pachytene stages are shown as merged images. **(A)**  $\gamma$ -H2AX. **(B)** RPA2 foci. **(C)** RAD51 foci.

A

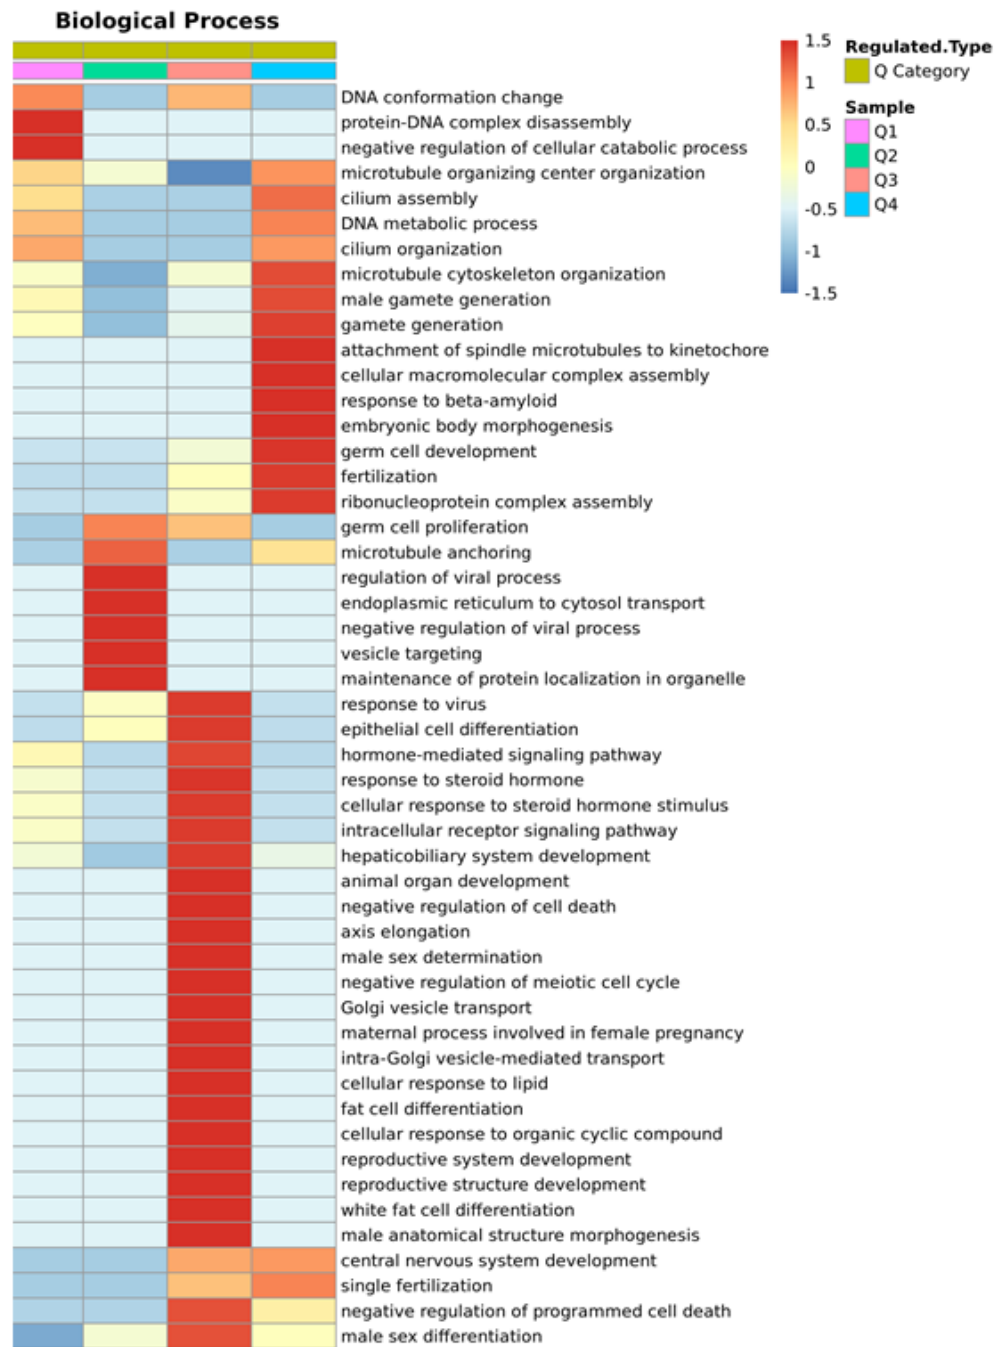

**Supplemental figure5. (A)** Gene ontology and KEGG analyses identified "germ cell development related pathway" as the most enriched pathway.

**Supplemental Table 1.**

Phospho-proteomics quantified of *Mscdk*<sup>-/-</sup> and wild type testes from PD19 mice.
